# Supplementary material for: Identification of Dietetically Absorbed Rapeseed (Brassica campestrisL.) Bee Pollen MicroRNAs in Serum of Mice
Source: Hindawi journal article supplement (doi:10.1155/2016/5413849), 2016-01-01
Supplement: f1 [file 5413849.f1.pdf]

| groups        | Abundance (uM) |      |      |      |      |
|---------------|----------------|------|------|------|------|
| Rapeseed bee  |                |      |      |      |      |
| pollen group  | 3.87           | 4.50 | 2.92 | 2.15 | 7.44 |
| Control group | 1.10           | 2.37 | 1.61 | 1.50 | 1.54 |

Additional table 1 The abundance of miR-166a in mice in groups of rapeseed bee pollen or control

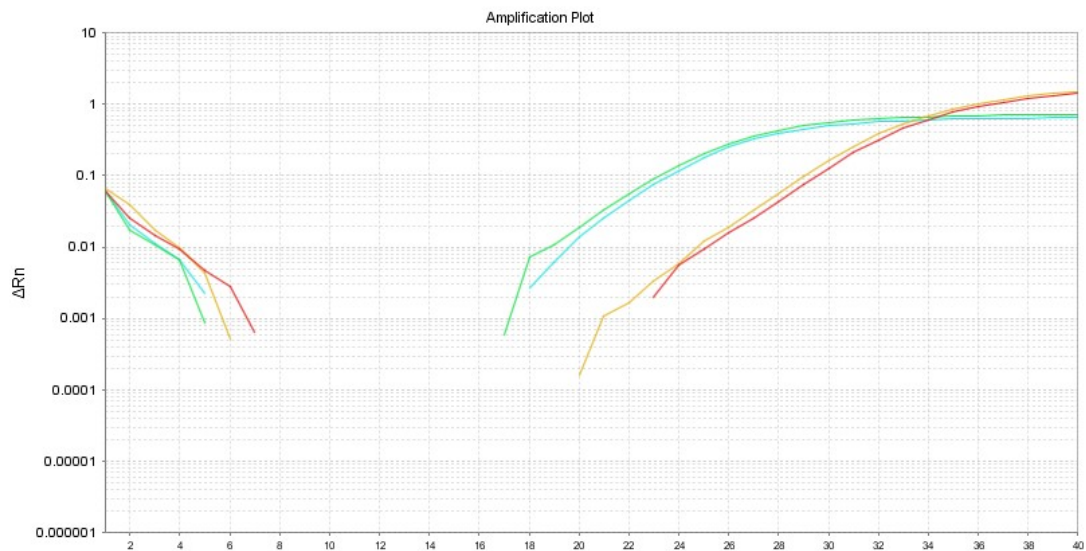

Additional Fig 1 The amplification curve of miR-159 (red) and miR-166a (green) by qPCR

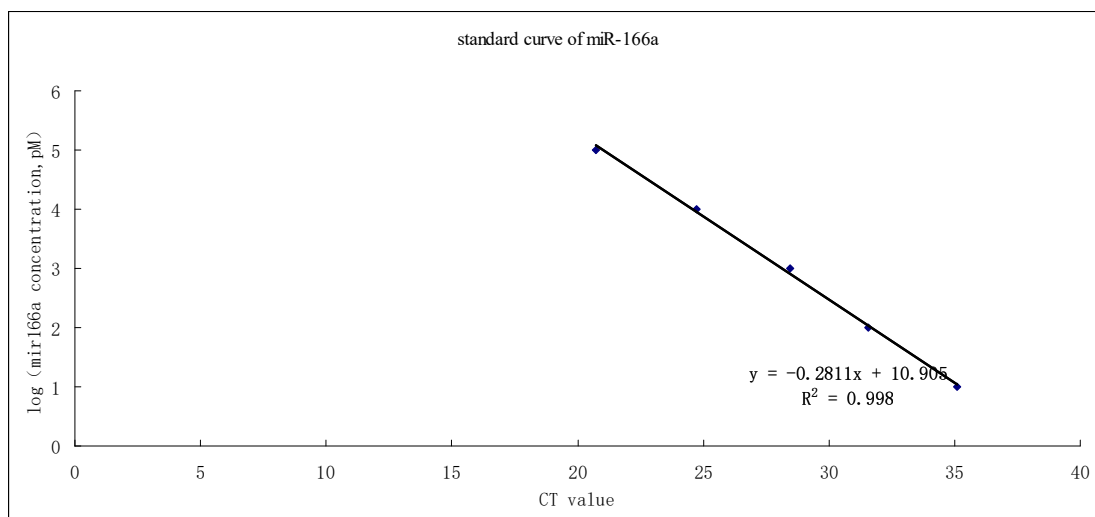

Additional Fig 2 Standard curve of miR-166a
